# Supplementary material for: Dynamic dual stage phosphorescence chromatic change in a diborylated iridium phosphor for fluoride ion sensing with concentration discriminating capability
Source: Royal Society of Chemistry journal article supplement (doi:10.1039/c3ra00082f), 2013-01-01
Supplement: c3ra00082f.pdf [file c3ra00082f.pdf]

# **Electronic Supplementary Information**

**for**

**Dynamic dual stage phosphorescence chromatic change in a diborylated iridium phosphor for fluoride ion sensing with concentration discriminating capability**

Xiaolong Yang, Zuan Huang, Cheuk-Lam Ho, Guijiang Zhou,\* Dong Ryeol Whang, Chunliang Yao, Xianbin Xu, Soo Young Park,\* Chung-Hin Chui and Wai-Yeung Wong\*

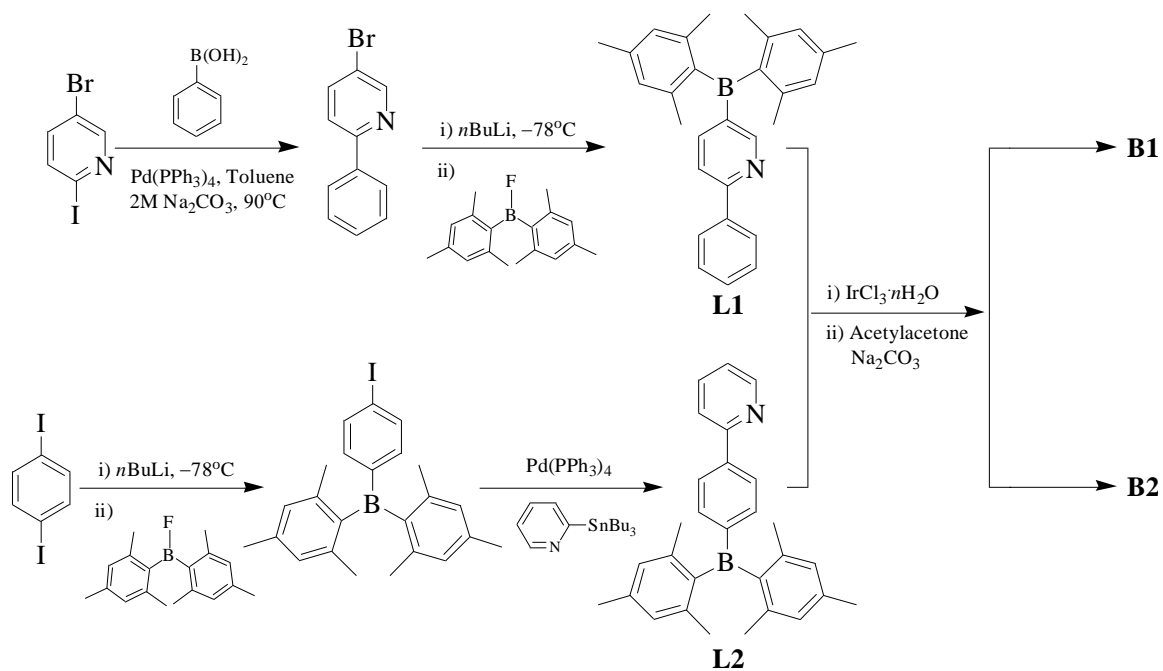

**Scheme S1** The synthetic protocol for the iridium(III) complexes **B1** and **B2**.

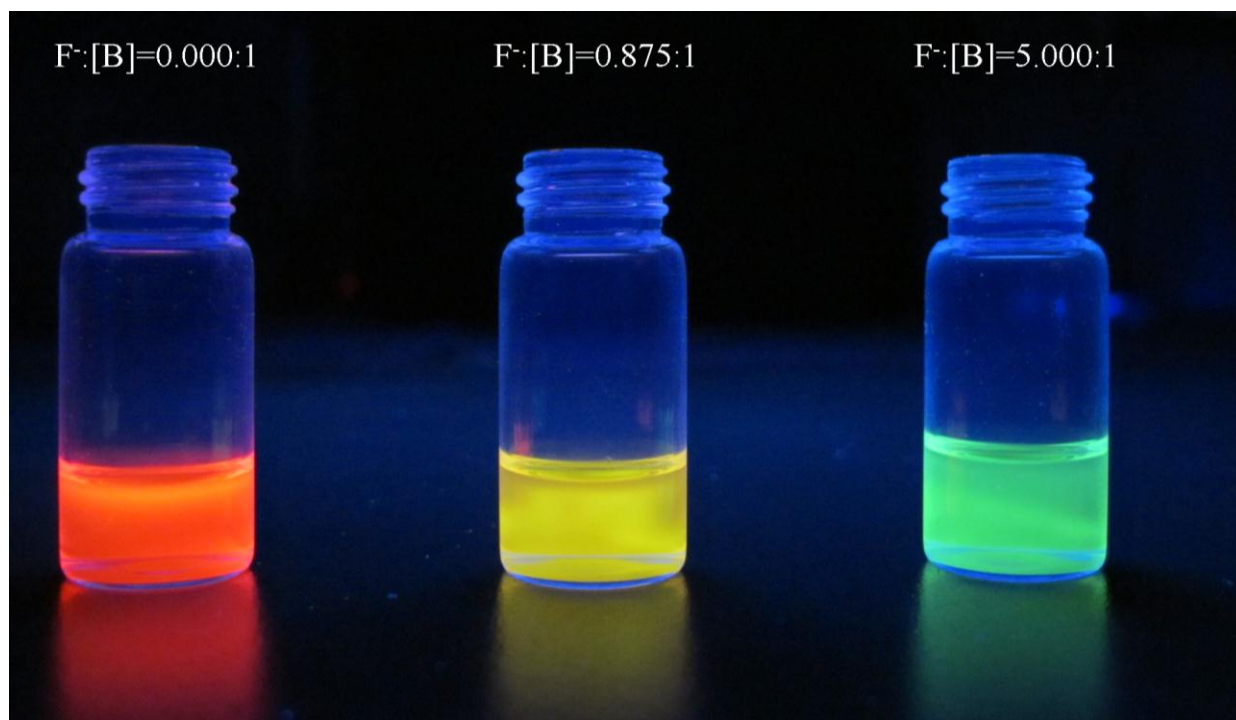

a)

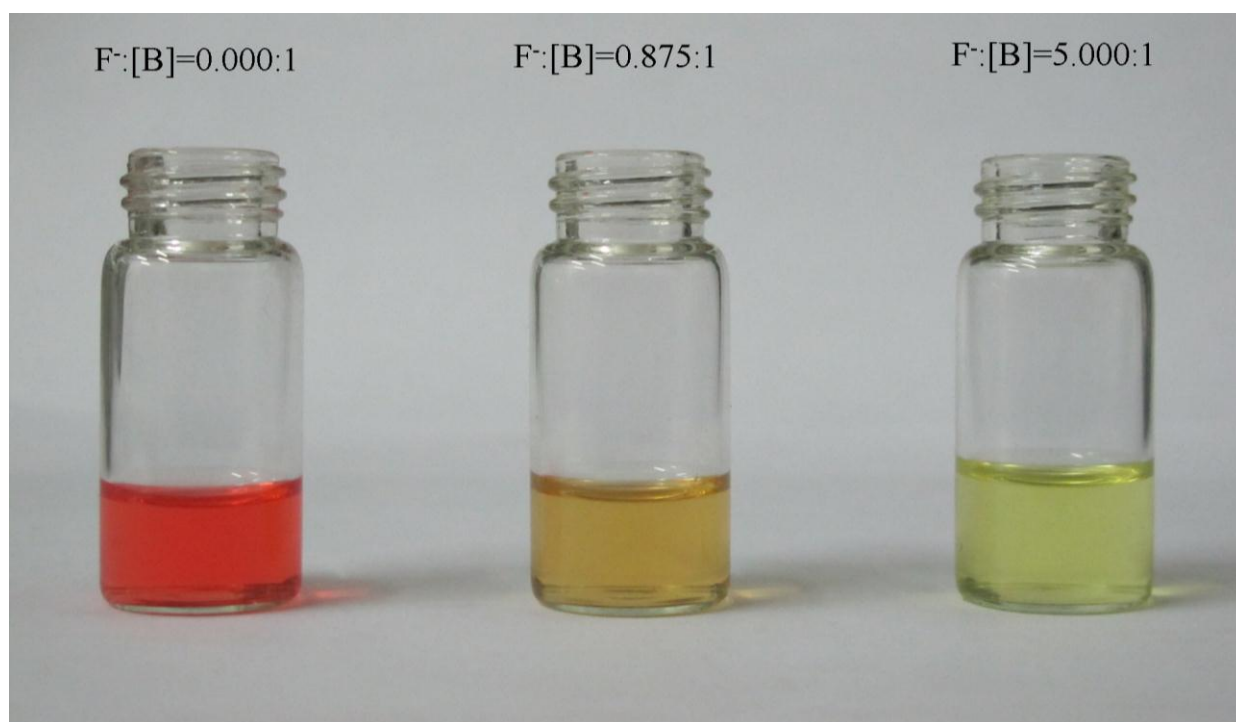

b)

**Fig. S1** a) Emission color response of the **B1** solution in THF to the concentration of  $F^-$  ion. b) Solution color response of the **B1** solution in THF to the concentration of  $F^-$  ion.

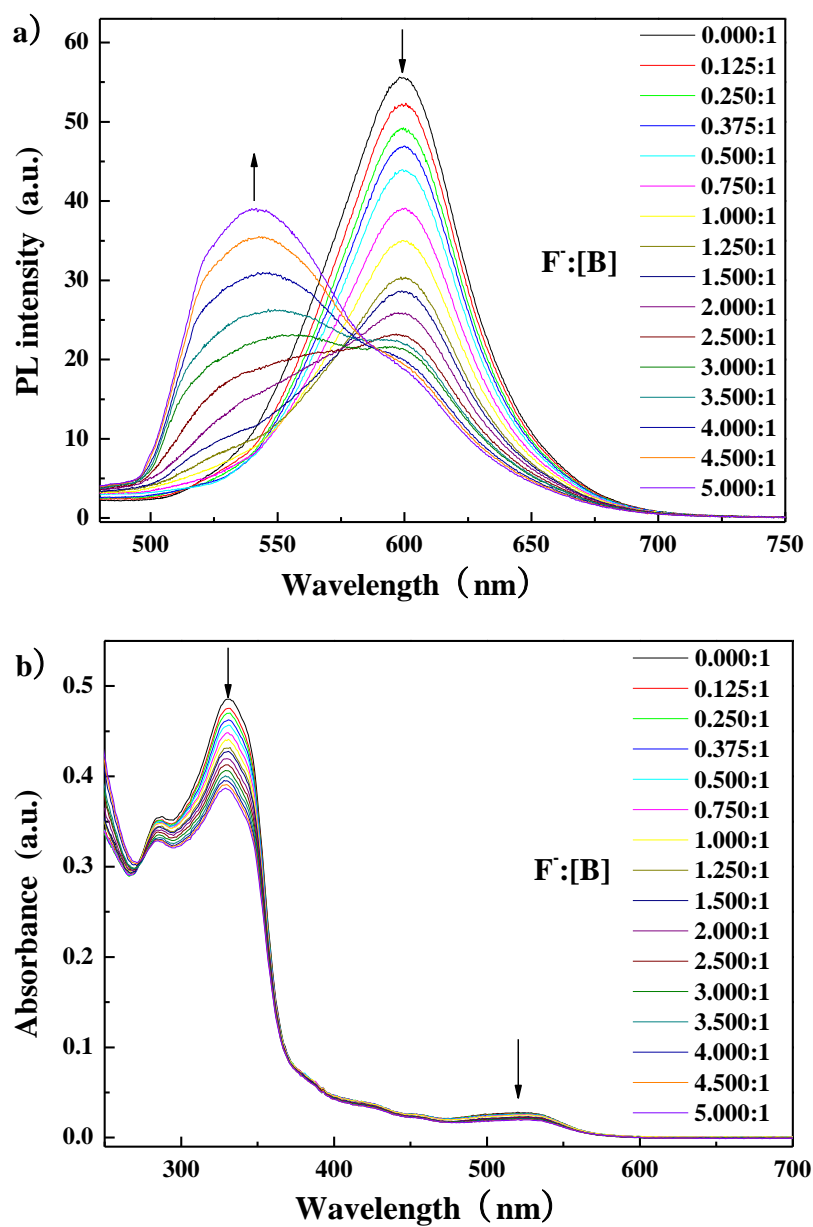

**Fig. S2** a) PL response of the **B2** solution in THF to the F<sup>-</sup> ion. b) Absorption response of the **B2** solution to the F<sup>-</sup> ion.

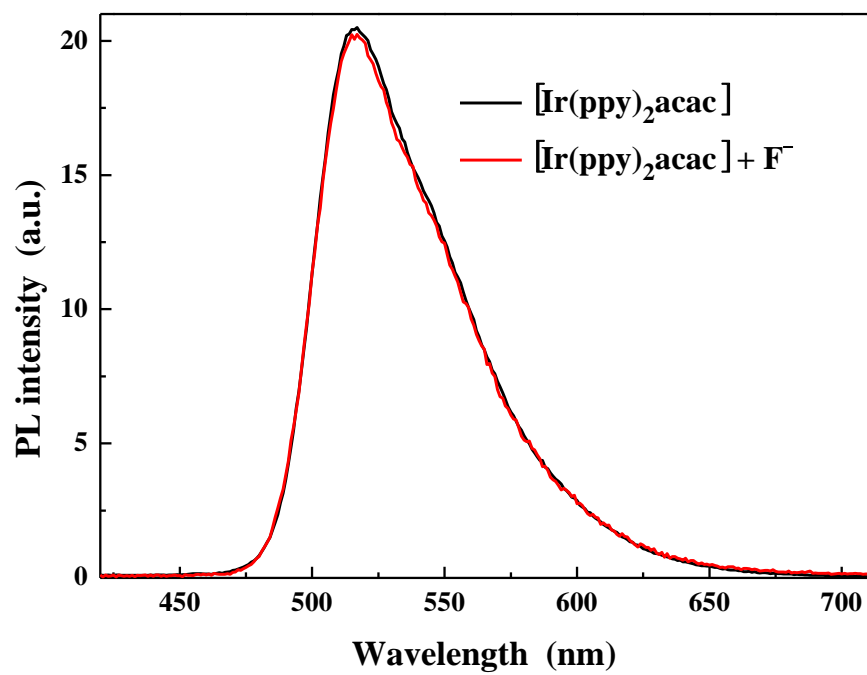

**Fig. S3** The PL spectra for [Ir(ppy)<sub>2</sub>acac] in THF solution before and after adding two equivalents of F<sup>-</sup> ion.

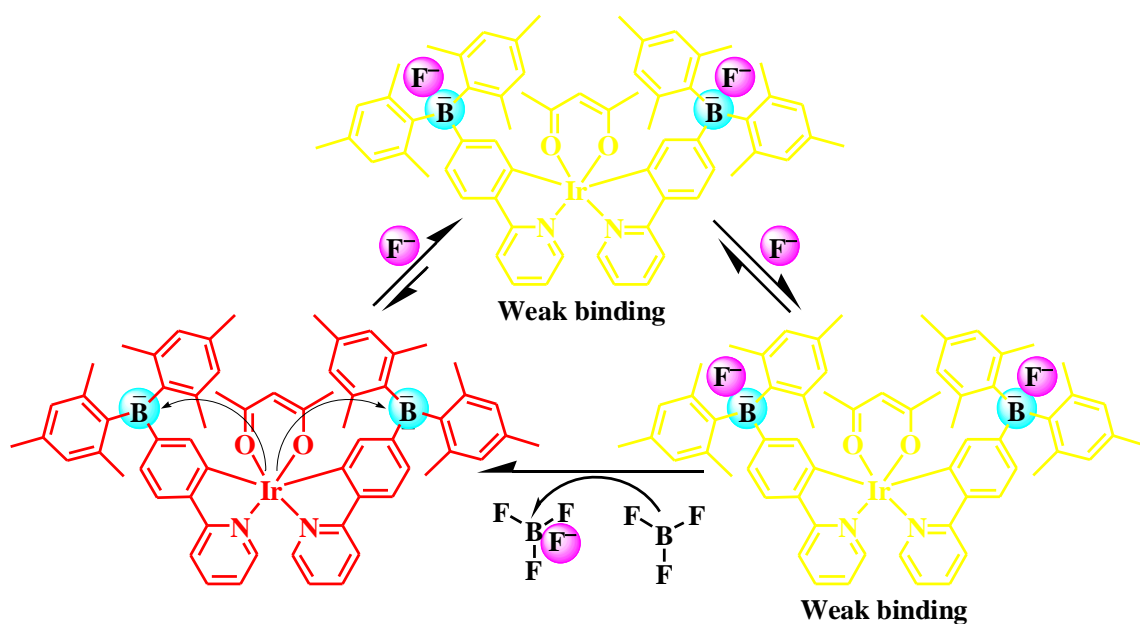

**Fig. S4** The proposed color-switching mechanism for the emission response of **B2** solution to the  $F^-$  ion and  $BF_3$  added.

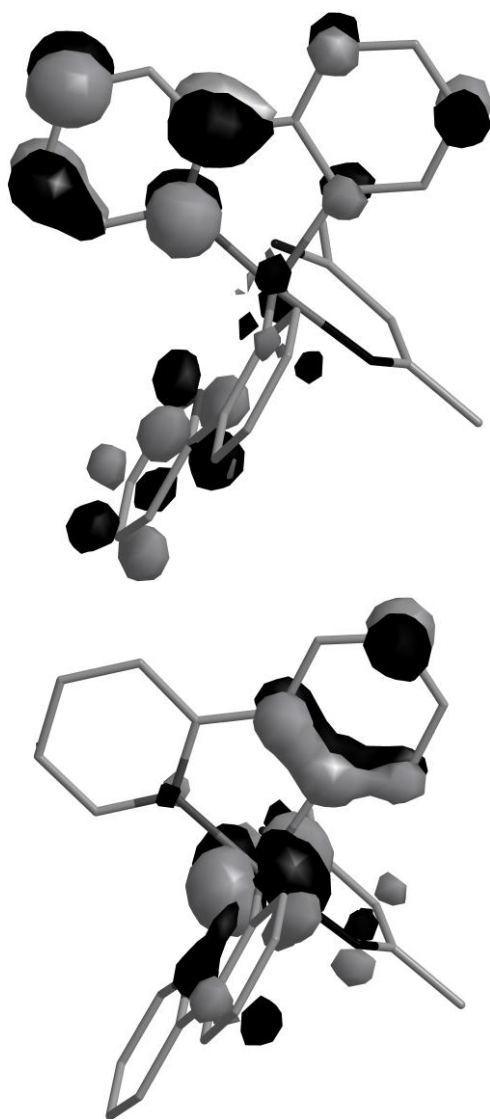

**Fig. S5** Plots of the LUMO (top) and HOMO (bottom) for [Ir(ppy)<sub>2</sub>acac].

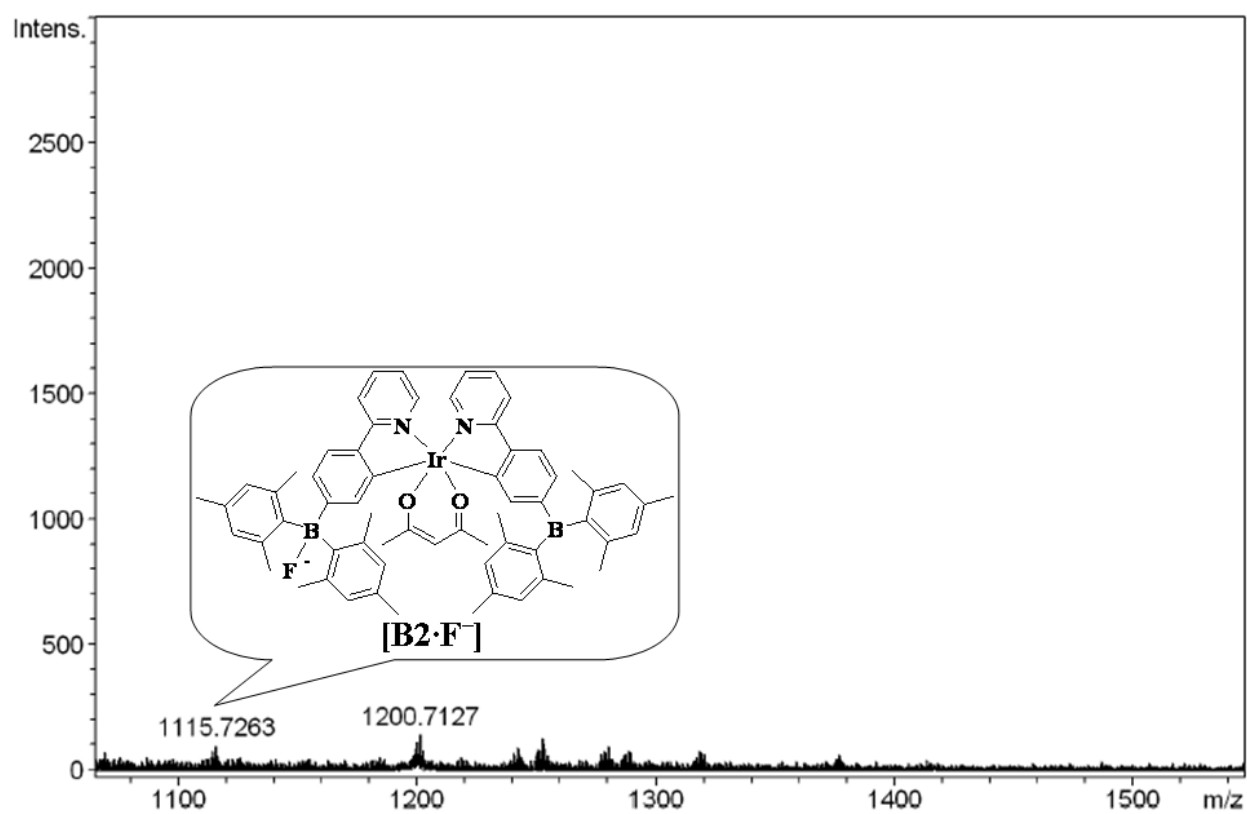

**Fig. S6** The TOF-MS spectrum obtained under negative ion polarity mode for the solution of **B2** in THF with F<sup>-</sup>:**[B]** at 5.000:1.



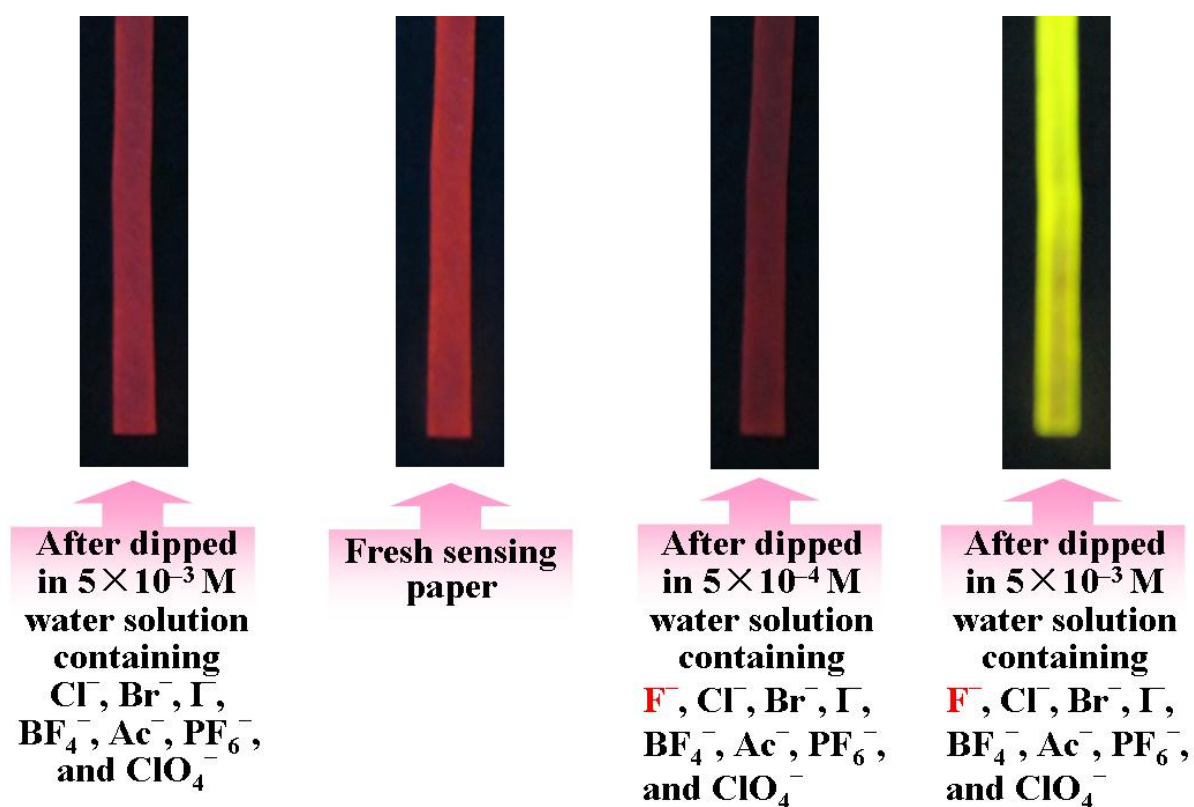

**Fig. S7** The emission color response of self-made sensing paper from **B2** to the  $\text{F}^-$  ion at different concentrations in water.
